# Supplementary material for: Ulva compressa from Copper-Polluted Sites Exhibits Intracellular Copper Accumulation, Increased Expression of Metallothioneins and Copper-Containing Nanoparticles in Chloroplasts
Source: MDPI journal article supplement (doi:10.3390/ijms221910531), 2021-09-29
Supplement: s1 [file s1]

**A**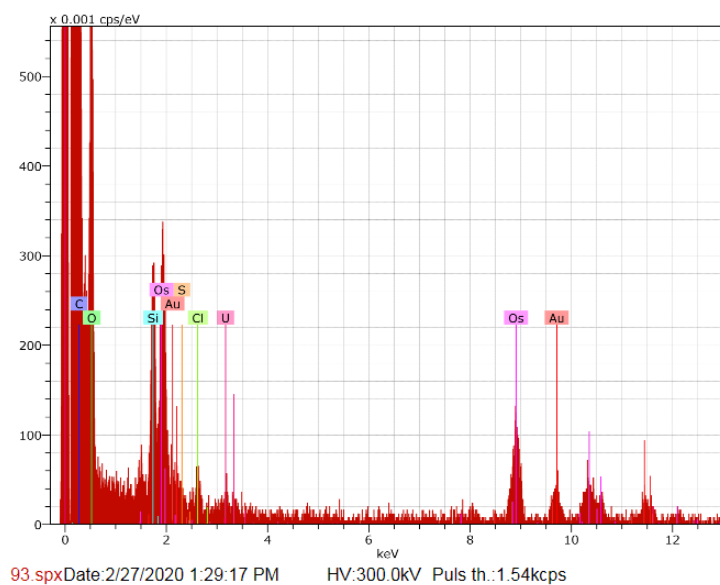**B**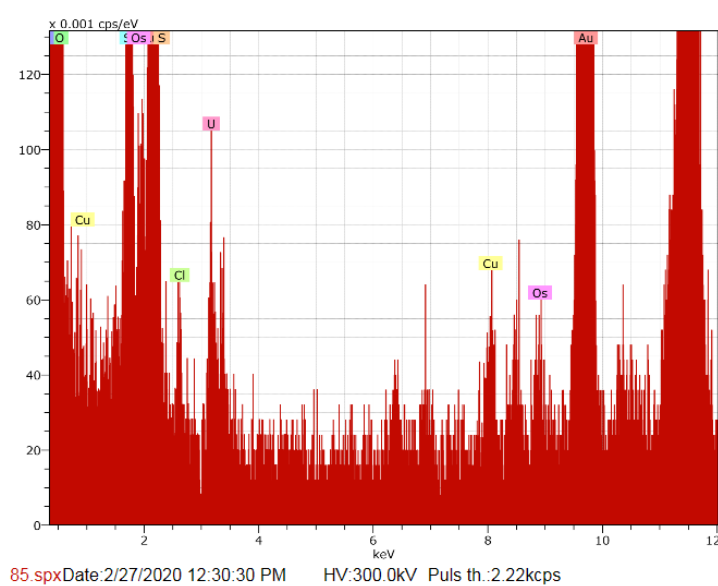

**Figure S1.** X-ray emission profiles of elementary metals detected by energy-dispersive x-ray spectrometry (EDXS) present in electrodense nanoparticles in a cell of *U. compressa* from a control site (A) and a copper-polluted site (B).
